# Supplementary material for: Circulating Tumor Cells and Circulating Tumor DNA Detection in Potentially Resectable Metastatic Colorectal Cancer: A Prospective Ancillary Study to the Unicancer Prodige-14 Trial
Source: MDPI journal article supplement (doi:10.3390/cells8060516), 2019-05-28

1 **Table S1:** blood samples available.

|                   | Biomarker assessed                                     |                                                          |
|-------------------|--------------------------------------------------------|----------------------------------------------------------|
|                   | CTC                                                    | ctDNA detection<br>(KRAS mutated tumors)                 |
| Baseline          | All patients<br>(KRASwt and KRASmut tumors)<br>N = 132 | All patients<br>(KRASwt and KRASmut tumors)<br>N=125 (*) |
| 4 weeks           | All patients<br>(KRASwt and KRASmut tumors)<br>N=108   | Patients with KRASmut tumors<br>N=35                     |
| Before LM surgery | All patients<br>(KRASwt and KRASmut tumors)<br>N=57    | Patients with KRASmut tumors<br>N=21                     |

(\*) of whom N=46 patients with KRASmut tumors

**Table S2:** associations between CTC levels (as a dichotomous variable:  $\geq 3$  or  $< 3$  CTC/7.5 mL) and clinicopathological characteristics of patients at baseline (when available), treatment arm or primary endpoint.

| Characteristics                             | $< 3$ CTC/7.5 mL | $\geq 3$ CTC/7.5 mL | p (Fisher's exact test) |
|---------------------------------------------|------------------|---------------------|-------------------------|
| <b>Performance Status</b>                   |                  |                     |                         |
| 0                                           | 66 (62%)         | 15 (60%)            | 0.82                    |
| 1                                           | 40 (38%)         | 10 (40%)            |                         |
| <b>Prior resection of the primary tumor</b> |                  |                     |                         |
| No                                          | 73 (68%)         | 19 (76%)            | 0.63                    |
| Yes                                         | 34 (32%)         | 6 (24%)             |                         |
| <b>Synchronous liver metastases</b>         |                  |                     |                         |
| No                                          | 16 (15%)         | 0 (0%)              | 0.04                    |
| Yes                                         | 91 (85%)         | 25 (100%)           |                         |
| <b>% of liver infiltrated by metastases</b> |                  |                     |                         |
| 00-25%                                      | 33 (52%)         | 2 (13%)             | 0.001                   |
| 26-50%                                      | 18 (29%)         | 5 (31%)             |                         |
| 51-75%                                      | 10 (16%)         | 4 (25%)             |                         |
| >75%                                        | 2 (3%)           | 5 (31%)             |                         |
| <b>Lung metastases</b>                      |                  |                     |                         |
| No                                          | 95 (90%)         | 22 (92%)            | 1.0                     |
| Yes                                         | 10 (10%)         | 2 (8%)              |                         |
| <b>CEA</b>                                  |                  |                     |                         |
| Normal                                      | 11 (10%)         | 3 (12%)             | 0.73                    |
| > upper limit of normal                     | 94 (90%)         | 22 (88%)            |                         |
| <b>CA19.9</b>                               |                  |                     |                         |
| Normal                                      | 31 (41%)         | 2 (12%)             | 0.04                    |
| > upper limit of normal                     | 44 (59%)         | 14 (88%)            |                         |
| <b>KRAS exon 2 mutation in tumor sample</b> |                  |                     |                         |
| No                                          | 61 (57%)         | 20 (80%)            | 0.04                    |
| Yes                                         | 46 (43%)         | 5 (20%)             |                         |
| <b>Chemotherapy</b>                         |                  |                     |                         |
| Doublet + targeted therapy                  | 52 (49%)         | 10 (40%)            | 0.51                    |
| Triplet + targeted therapy                  | 55 (51%)         | 15 (60%)            |                         |
| <b>R0/R1 resection of liver metastases</b>  |                  |                     |                         |
| No                                          | 40 (37%)         | 13 (52%)            | 0.18                    |
| Yes                                         | 67 (63%)         | 12 (48%)            |                         |

10

11 **Table S3:** associations between ctDNA detection (as a dichotomous variable) and  
 12 clinicopathological characteristics of patients at baseline (when available), treatment arm or  
 13 primary endpoint.

| Characteristics                             | ctDNA not detected | ctDNA detected | p (Fisher's exact test) |
|---------------------------------------------|--------------------|----------------|-------------------------|
| <b>Performance Status</b>                   |                    |                |                         |
| 0                                           | 44 (57%)           | 33 (70%)       | 0.18                    |
| 1                                           | 33 (43%)           | 14 (30%)       |                         |
| <b>Prior resection of the primary tumor</b> |                    |                |                         |
| No                                          | 55 (71%)           | 33 (69%)       | 0.84                    |
| Yes                                         | 22 (29%)           | 15 (31%)       |                         |
| <b>Synchronous liver metastases</b>         |                    |                |                         |
| No                                          | 10 (13%)           | 5 (10%)        | 0.78                    |
| Yes                                         | 67 (87%)           | 43 (90%)       |                         |
| <b>% of liver infiltrated by metastases</b> |                    |                |                         |
| 00-25%                                      | 20 (42%)           | 12 (44%)       | 0.95                    |
| 26-50%                                      | 14 (29%)           | 8 (30%)        |                         |
| 51-75%                                      | 8 (17%)            | 5 (19%)        |                         |
| >75%                                        | 6 (12%)            | 2 (7%)         |                         |
| <b>Lung metastases</b>                      |                    |                |                         |
| No                                          | 67 (89%)           | 42 (89%)       | 1.0                     |
| Yes                                         | 8 (11%)            | 5 (11%)        |                         |
| <b>CEA</b>                                  |                    |                |                         |
| Normal                                      | 6 (8%)             | 6 (13%)        | 0.53                    |
| > upper limit of normal                     | 70 (92%)           | 41 (87%)       |                         |
| <b>CA19.9</b>                               |                    |                |                         |
| Normal                                      | 22 (43%)           | 9 (25%)        | 0.11                    |
| > upper limit of normal                     | 29 (57%)           | 27 (75%)       |                         |
| <b>KRAS exon 2 mutation in tumor sample</b> |                    |                |                         |
| No                                          | 73 (95%)           | 6 (12%)        | 0.001                   |
| Yes                                         | 4 (5%)             | 42 (88%)       |                         |
| <b>Chemotherapy</b>                         |                    |                |                         |
| Doublet + targeted therapy                  | 38 (49%)           | 24 (50%)       | 1.0                     |
| Triplet + targeted therapy                  | 39 (51%)           | 24 (50%)       |                         |
| <b>R0/R1 resection of liver metastases</b>  |                    |                |                         |
| No                                          | 28 (36%)           | 20 (42%)       | 0.55                    |
| Yes                                         | 49 (64%)           | 28 (58%)       |                         |

14

15

**Table S4:** Multivariate Cox regression with CTC detection at baseline and at 4 weeks (Overall Survival). Number of patients included in the multivariate analysis: N = 91 at baseline, N = 75 at 4 weeks. Patients with one or more missing covariable were not included in the multivariate analysis.

| Factors                                 | Baseline       |       | At 4 weeks     |       |
|-----------------------------------------|----------------|-------|----------------|-------|
|                                         | HR (95% CI)    | p     | HR (95%CI)     | p     |
| Chemotherapy: triplet versus doublet    | 0.42 [0.2;0.9] | 0.019 | 0.47 [0.2;1.1] | 0.083 |
| KRAS status: mutated versus wild type   | 3.9 [1.6;9.6]  | 0.003 | 3.4 [1.3;8.9]  | 0.013 |
| CEA: elevated versus normal             | 2.7 [1.1;6.1]  | 0.02  | 2.2 [0.95;5.2] | 0.065 |
| CTC count: $\geq 3/7.5$ mL versus $< 3$ | 2.8 [1.3;6]    | 0.008 | 34.6 [4.5;266] | 0.001 |

**Figure S1:** post-operative overall survival according to ctDNA detection at 4 weeks.

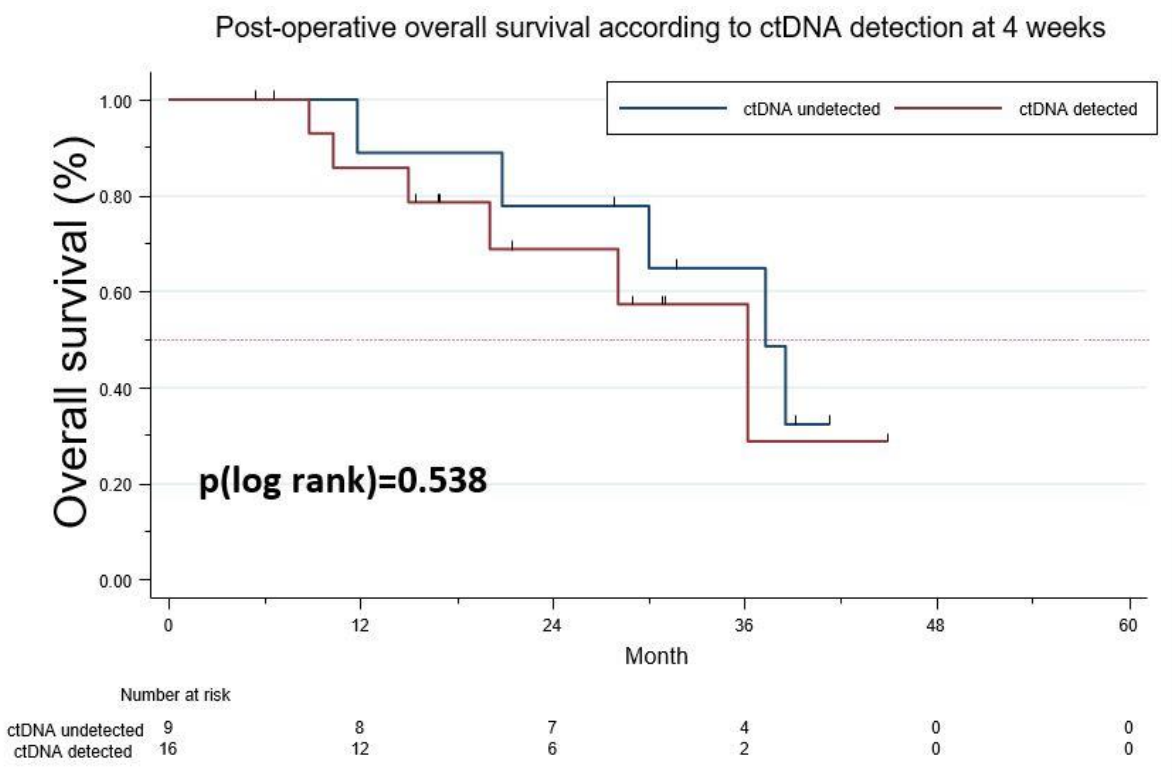

Supplement: s1 [file s1]
